# Supplementary material
Source: Springer Nature journal article supplement (https://www.springermedizin.de/resource/supplementary/12943_2014_1318_MOESM5_ESM.pdf/9552678)

A.i

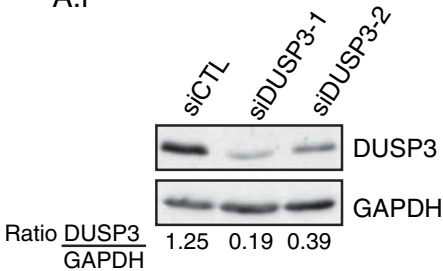

A.ii

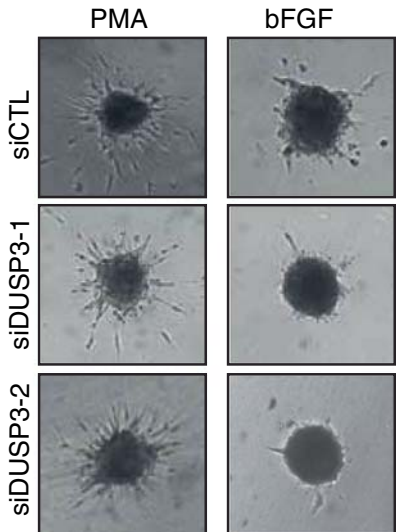

A.iii

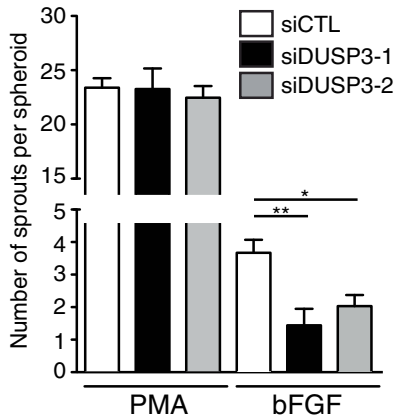

Supplement: MOESM5 [file 9552678]
